# Supplementary figures and images for: Neutrophil roles in left ventricular remodeling following myocardial infarction
Source: Springer Nature journal article supplement (doi:10.1186/1755-1536-6-11), 2013-06-03

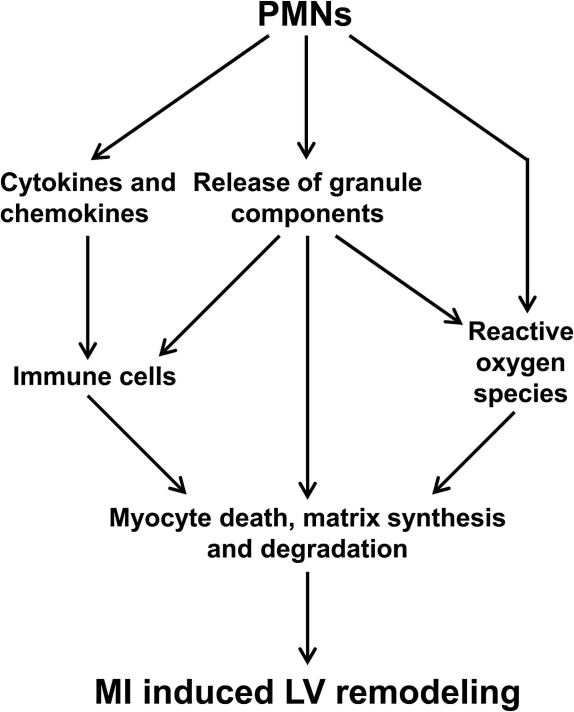

Supplement: 13069_2012_128_MOESM3_ESM.pdf [file 13069_2012_128_MOESM3_ESM.pdf]
